# Supplementary material
Source: PubMed Central journal article supplement (PMC4085738)
Supplement: NIHMS605056-supplement-Table_1.pdf [file NIHMS605056-supplement-Table_1.pdf]

**Supplementary Table 1. Coefficients from linear regression models used for ROC analysis.**

| Gene      | Glycolysis Signature Coefficients | Spliceosome Signature Coefficients | Combine Signature Coefficients |
|-----------|-----------------------------------|------------------------------------|--------------------------------|
| ALDH7A1   | 0.301                             |                                    | -0.246                         |
| ALDOA     | 0.301                             |                                    | -0.246                         |
| DLD       | -1.019                            |                                    | -2.614                         |
| ENO1      | 0.454                             |                                    | 0.647                          |
| FBP1      | 1.346                             |                                    | 2.977                          |
| GAPDH     | 0.277                             |                                    | 0.304                          |
| GPI       | 0.273                             |                                    | 0.391                          |
| PKM2      | -0.463                            |                                    | -0.965                         |
| TPI1      | -0.140                            |                                    | -0.636                         |
| EFTUD2    |                                   | -0.033                             | 0.221                          |
| HNRNPA1   |                                   | 0.476                              | 0.714                          |
| HNRNPA2B1 |                                   | -0.297                             | -0.064                         |
| HNRNPK    |                                   | 0.568                              | 0.542                          |
| HSPA8     |                                   | -0.295                             | -0.484                         |
| PTBP1     |                                   | -0.014                             | 0.415                          |
| RALY      |                                   | 0.999                              | 1.057                          |
| SAP18     |                                   | -1.167                             | -1.725                         |
| SF3A1     |                                   | -0.064                             | 0.120                          |
| SFRS1     |                                   | 0.088                              | -0.077                         |
| SFRS3     |                                   | 0.039                              | 0.136                          |
| SFRS6     |                                   | -0.312                             | -0.559                         |
| SYNCRIP   |                                   | 0.234                              | 0.173                          |
| U2AF1     |                                   | 0.822                              | 1.064                          |
