# Supplementary material
Source: PubMed Central journal article supplement (PMC4085738)
Supplement: NIHMS605056-supplement-Table_2.pdf [file NIHMS605056-supplement-Table_2.pdf]

**Supplementary Table 2. Peptide sequences from proteins identified in immune complexes**

| Gene  | Peptide sequence                                                                                                                                                                                                         |
|-------|--------------------------------------------------------------------------------------------------------------------------------------------------------------------------------------------------------------------------|
| ALDOA | IGEHTPSALAIMENANVLAR<br>PYQYPALTPEQK                                                                                                                                                                                     |
| ENO1  | AAVPSGASTGIYEALELR<br>GNPTVEVDLFTSK<br>IGAEVYHNLK<br>LAMQEFMILPVGAANFR<br>LMIEMDGTENK<br>SFIKDYPVVSIEDPFDQDDWGAWQK<br>YISPDQLADLYK                                                                                       |
| GAPDH | GALQNIPASTGAAK<br>LISWYDNEFGYSNR<br>LTGMAFR<br>LVINGNPITIFQER<br>VDIVAINDPFIDLNYMVYMFQYDSTHGK<br>VGVNGFGR<br>VIHDNFGIVEGLMTTVHAITATQK<br>VIISAPSADAPMFVMGVNHEK<br>VPTANVSVVDLTCR<br>VVDLMAHMASK<br>WGDAGAEYVVESTGVFTTMEK |
| TPI1  | HVFGESDELIGQK<br>SNVSDAVAQSTR<br>TATPQQAQEVHEK<br>VVLAYEPVWAIGTGK                                                                                                                                                        |
| PKM2  | NTGIICTIGPASR<br>TATESFASDPILYRPVAVALDTK                                                                                                                                                                                 |
